# Supplementary material for: Identification of novel 1,2,3-triazole isatin derivatives as potent SARS-CoV-2 3CLpro inhibitors via click-chemistry-based rapid screening
Source: Royal Society of Chemistry journal article supplement (doi:10.1039/d3md00306j), 2023-01-01

**Supporting Information for**

**Original article**

**Identification of Novel 1,2,3-triazole Isatin Derivatives as Potent SARS-CoV-2 3CLpro Inhibitors via Click-chemistry-based Rapid Screening**

Xiangyi Jiang<sup>a</sup>, Jing Li<sup>a</sup>, Antonio Viayna<sup>b,c</sup>, F. Javier Luque<sup>b,c,d</sup>, Molly Woodson<sup>e,f</sup>, Lanlan Jing<sup>a</sup>, Shenghua Gao<sup>a</sup>, Fabao Zhao<sup>a</sup>, Minghui Xie<sup>a</sup>, Karoly Toth<sup>e,f</sup>, John Tavis<sup>e,f</sup>, Ann E. Tollefson<sup>e,f,\*</sup>, Xinyong Liu<sup>a,\*</sup> and Peng Zhan<sup>a,\*</sup>

*<sup>a</sup>Department of Medicinal Chemistry, Key Laboratory of Chemical Biology (Ministry of Education), School of Pharmaceutical Sciences, Cheeloo College of Medicine, Shandong University, 44 West Culture Road, 250012 Jinan, Shandong, PR China*

*<sup>b</sup>Departament de Nutrició, Ciències de l'Alimentació i Gastronomia, Facultat de Farmàcia i Ciències de l'Alimentació, Universitat de Barcelona (UB), Av. Prat de la Riba 171, 08921 Santa Coloma de Gramenet, Spain.*

*<sup>c</sup>Institut de Biomedicina (IBUB), Universitat de Barcelona (UB), Barcelona, Spain.*

*<sup>d</sup>Institut de Química Teòrica i Computacional (IQTCUB), Universitat de Barcelona (UB), Barcelona, Spain.*

*<sup>e</sup>Department of Molecular Microbiology and Immunology, Saint Louis University School of Medicine, St. Louis, Missouri 63104, United States.*

*<sup>f</sup>Saint Louis University Institute for Drug and Biotherapeutic Innovation, St. Louis, Missouri 63104, United States.*

Table S1. Anti-SARS-CoV-2 activity and cytotoxicity of the tested compounds.

| Compounds                          | D1N8            | D1N18 | D1N52 | L-26  |
|------------------------------------|-----------------|-------|-------|-------|
| EC <sub>50</sub> (μM) <sup>a</sup> | NA <sup>c</sup> | NA    | NA    | NA    |
| CC <sub>50</sub> (μM) <sup>b</sup> | > 20            | > 20  | > 20  | < 2.2 |

<sup>a</sup> EC<sub>50</sub>: concentration of compound required to achieve 50% protection of Vero E6 cell cultures against SARS-CoV-2-induced cytopathicity.

<sup>b</sup> CC<sub>50</sub>: concentration required to reduce the viability of mock-infected cell cultures (cytotoxicity, CC) by 50%.

<sup>c</sup> NA: no anti-SARS-CoV-2 activity at the test concentration.

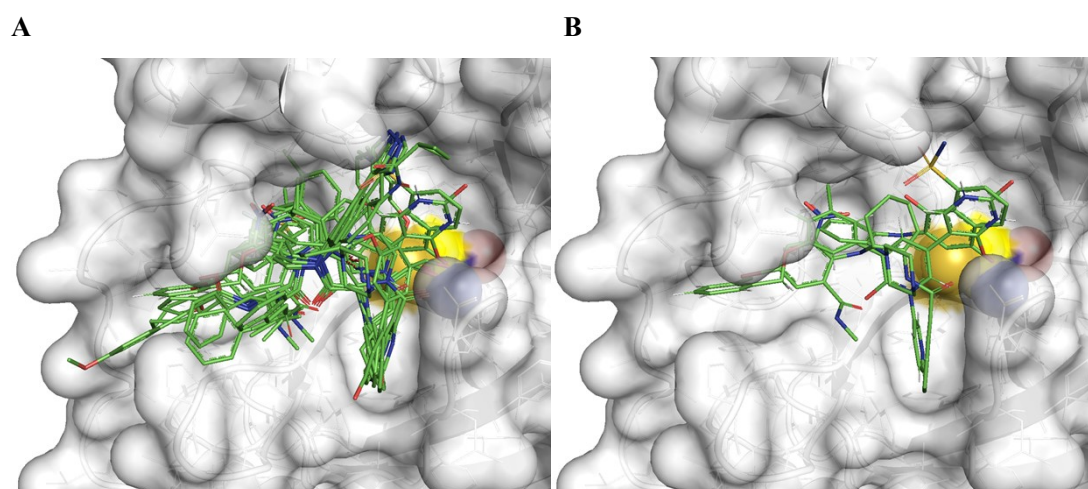

**Figure S1.** (a) Representation of the arrangement of selected covalent and noncovalent inhibitors bound to the binding pocket of the SARS-CoV-2 3CL<sup>pro</sup> enzyme (ligands taken from X-ray structures with PDB ID 7EN8, 7EN9, 7LMD, 7LME, 7LMF, 7LTJ, 7LTN, 7M8P, 7TEK, 7TEL, 7V1T, 7WO1, 7WO2, 7WO3, 7WOF, and 7WOH). (b) Representation of the binding mode of ligands taken from X-ray structures with PDB ID 7EN8, 7M8P and 7V1T. The shape and size of the binding pocket is shown by the surface of the enzyme (using the X-ray crystallographic structure with PDB ID 7EN8), and the reactive Cys is highlighted in yellow. The superposition of the X-ray ligands (shown as sticks with carbon atoms colored in green) fills the distinct subpockets that can be identified in the binding site.

**A**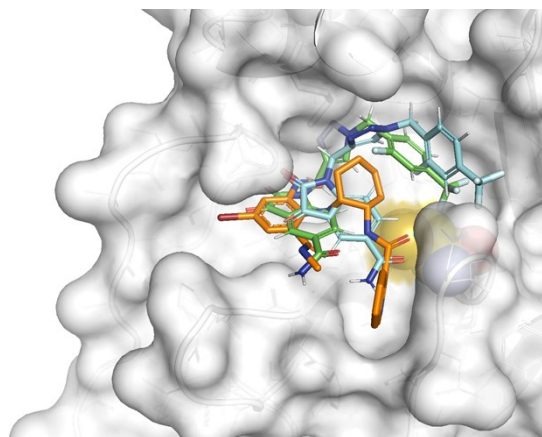**B**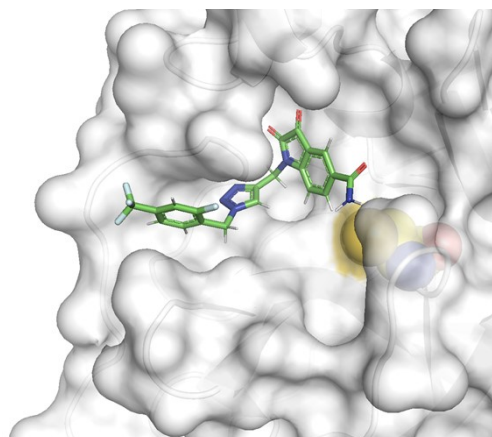

**Figure S2.** (a) Representation of the docked poses of **D1N52** in the binding pocket of 7EN8 (sticks with carbon atoms in green) and 7V1T (sticks with carbon atom in cyan). The X-ray ligand bound to 7EN8 is shown as sticks with carbon atoms in orange. (b) Representation of the binding mode of D1N52 in the binding pocket of 7M8P (sticks with carbon atoms in green). The shape and size of the binding pocket is shown by the surface of the enzyme, and the reactive Cys is highlighted in yellow.

# LC-MS results of crude products D1N8, D1N18 and D1N52.

RT: 0.00 - 19.81 SM: 7B

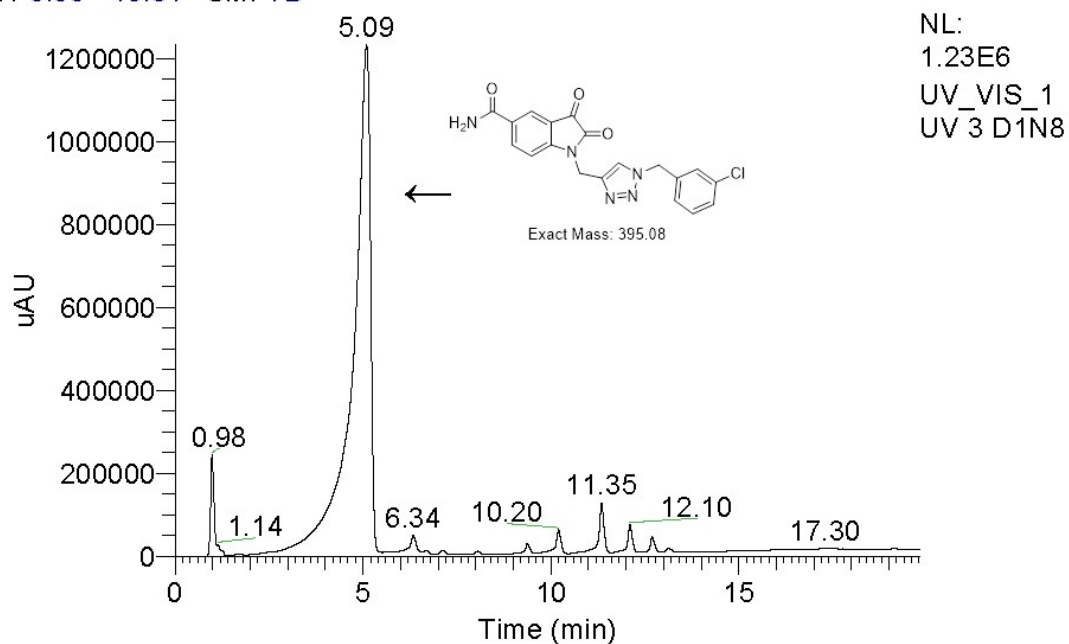

D1N8 #1858 RT: 4.78 AV: 1 NL: 7.37E1  
T: ITMS + c ESI Full ms [150.00-900.00]

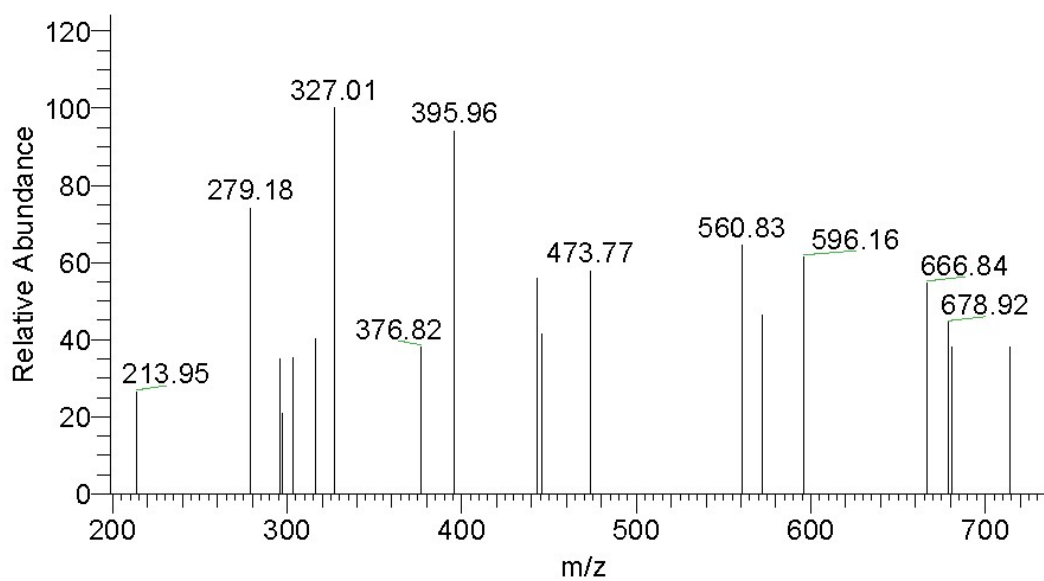

RT: 0.00 - 30.00 SM: 7B

NL:  
2.58E6  
UV\_VIS\_1  
UV 3  
D1N18

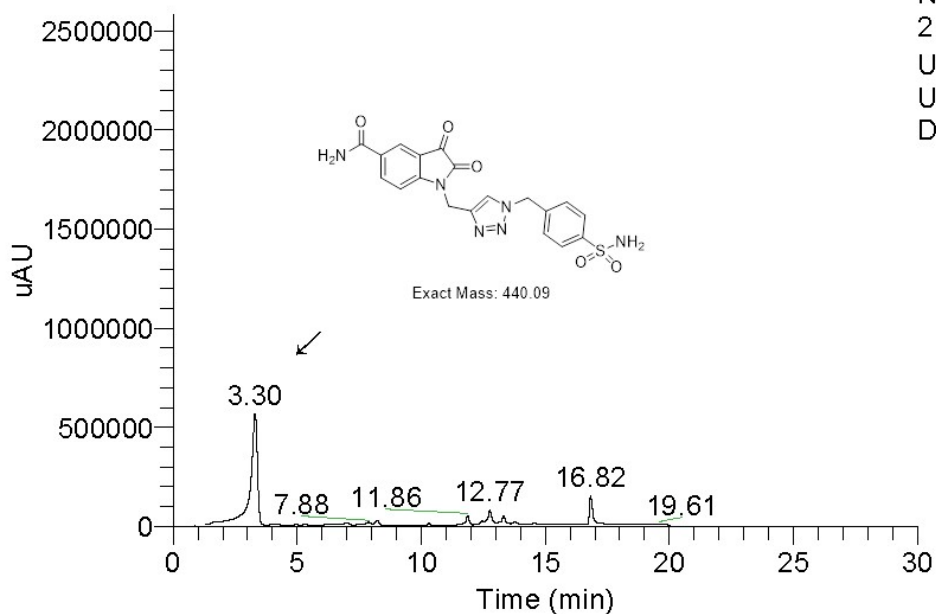

D1N18 #1257 RT: 3.14 AV: 1 NL: 1.73E2  
T: ITMS + c ESI Full ms [200.00-900.00]

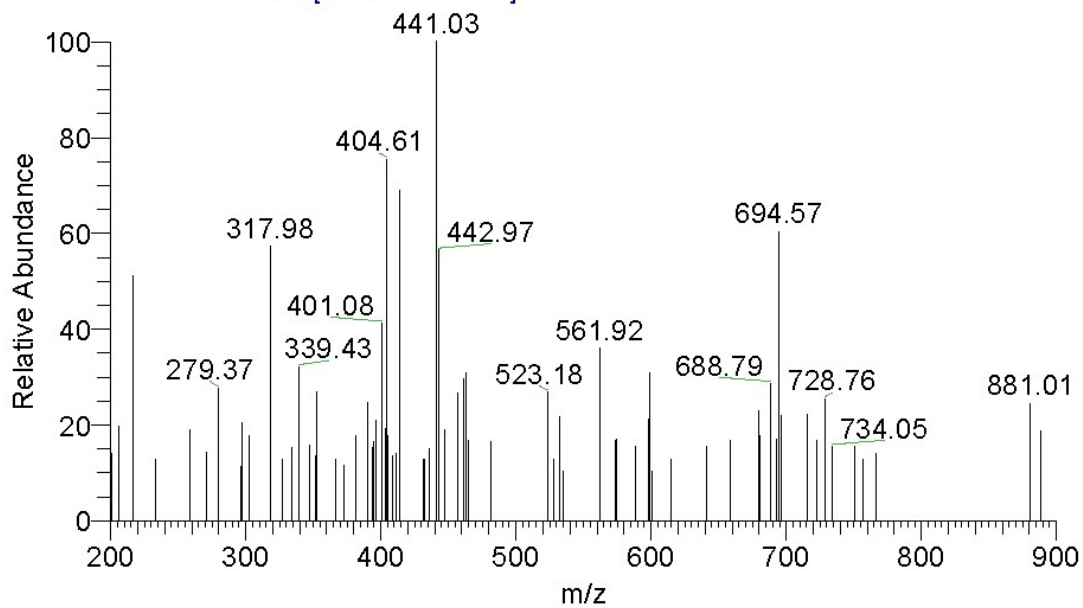

RT: 0.00 - 22.20 SM: 7B

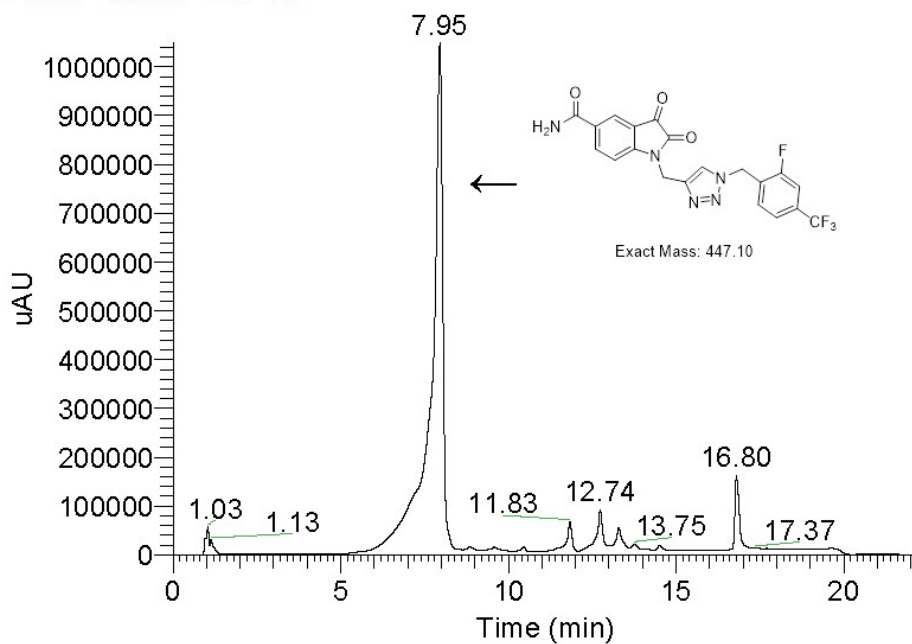

NL:  
1.05E6  
UV\_VIS\_1  
UV 3  
D1N52\_230  
718225429

D1N52\_230718225429 #3179 RT: 7.94 AV: 1 NL: 3.73E2  
T: ITMS + c ESI Full ms [200.00-900.00]

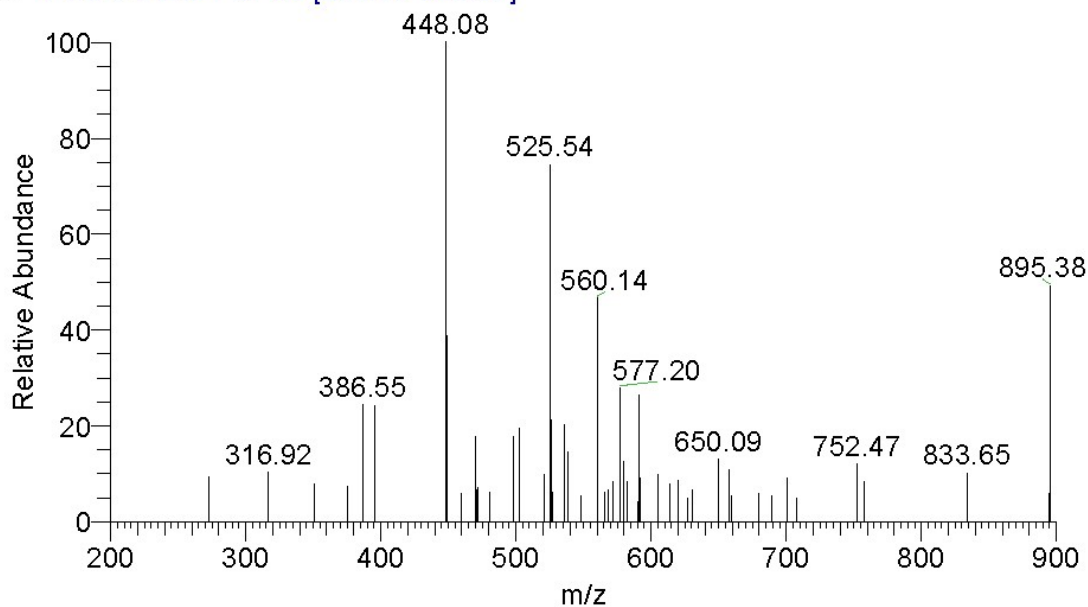

# Original spectra of compounds.

## Compound D1

D71\_2022121601 #217-262 RT: 0.63-0.76 AV: 46 NL: 6.11E4  
T: ITMS+c ES Full.ms [100.00-1000.00]

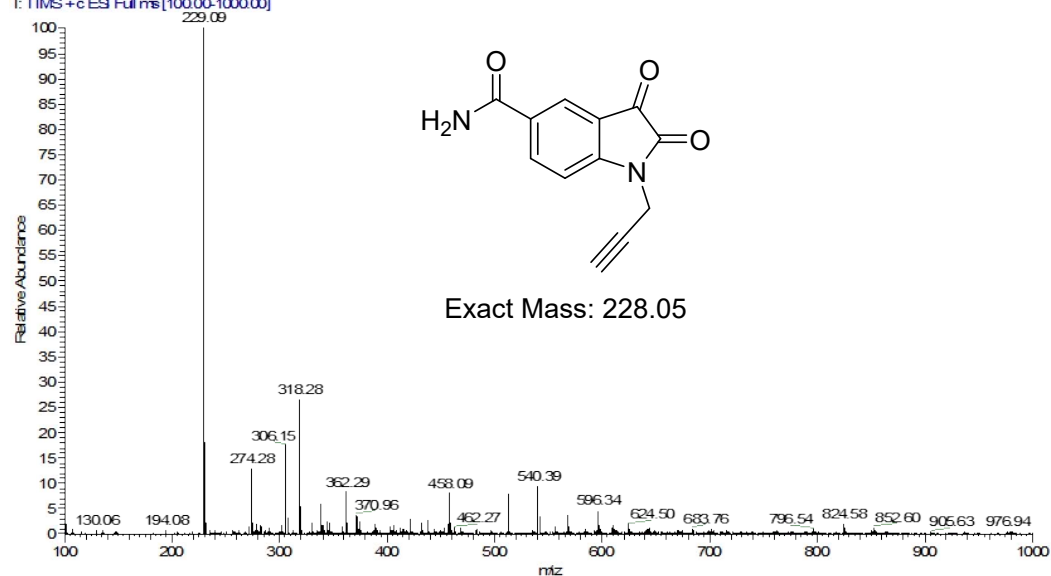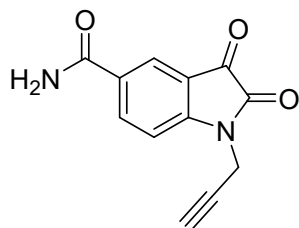

Exact Mass: 228.05

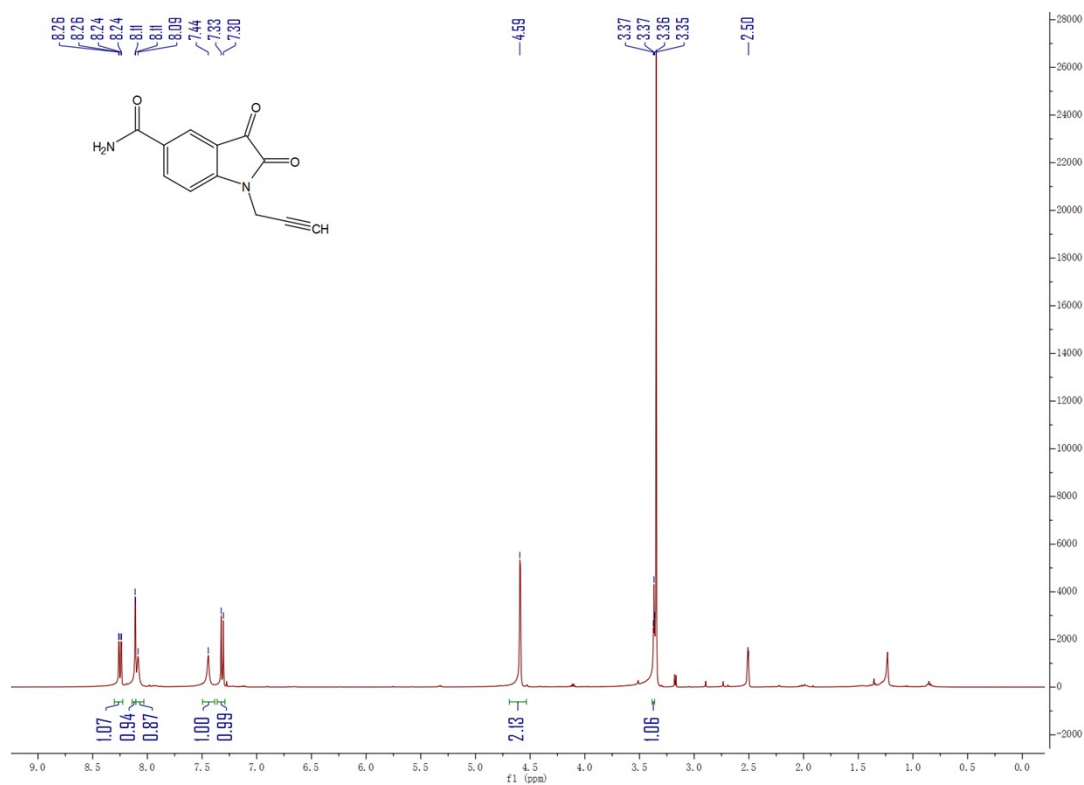

# Compound D1N8

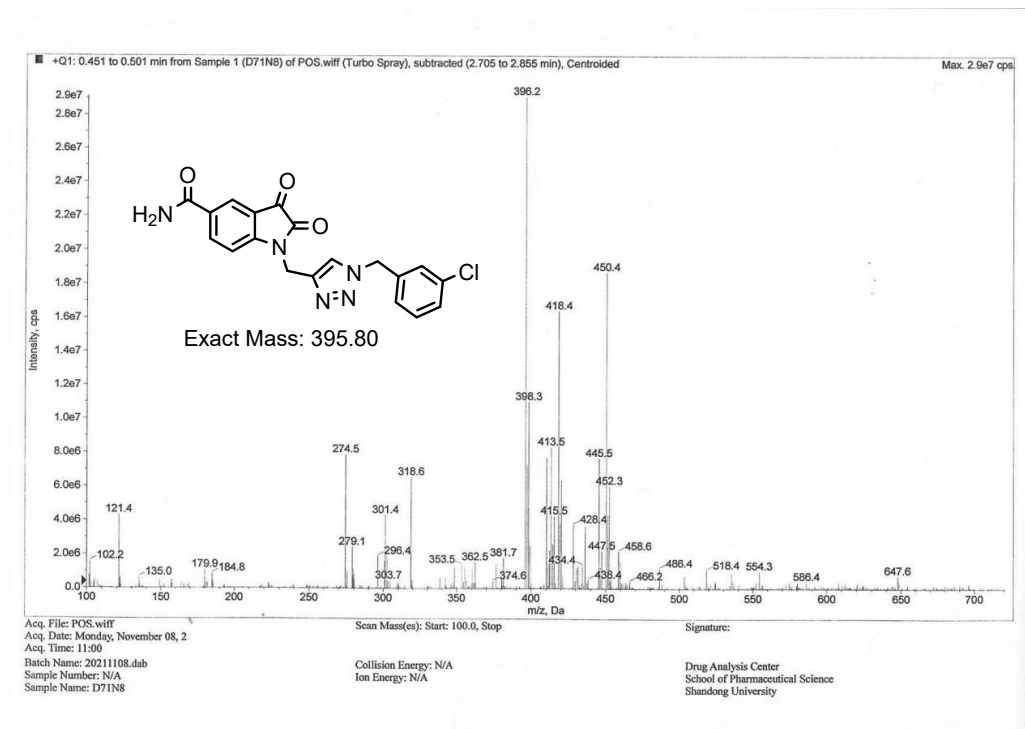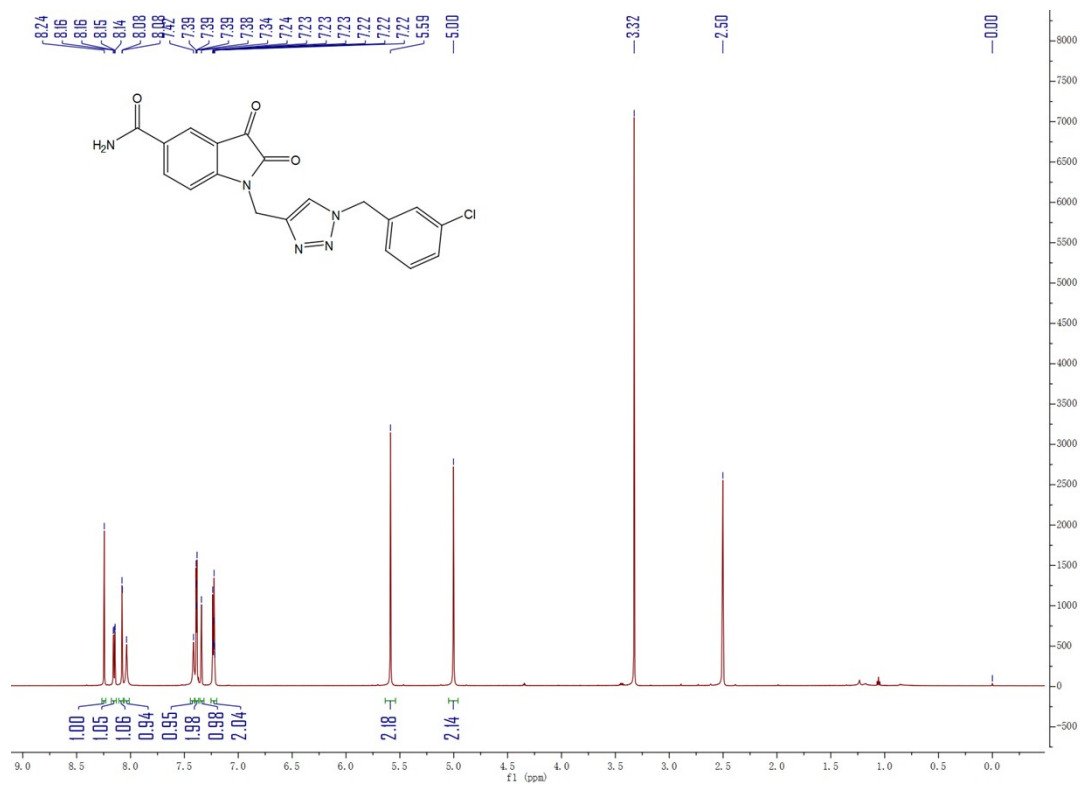



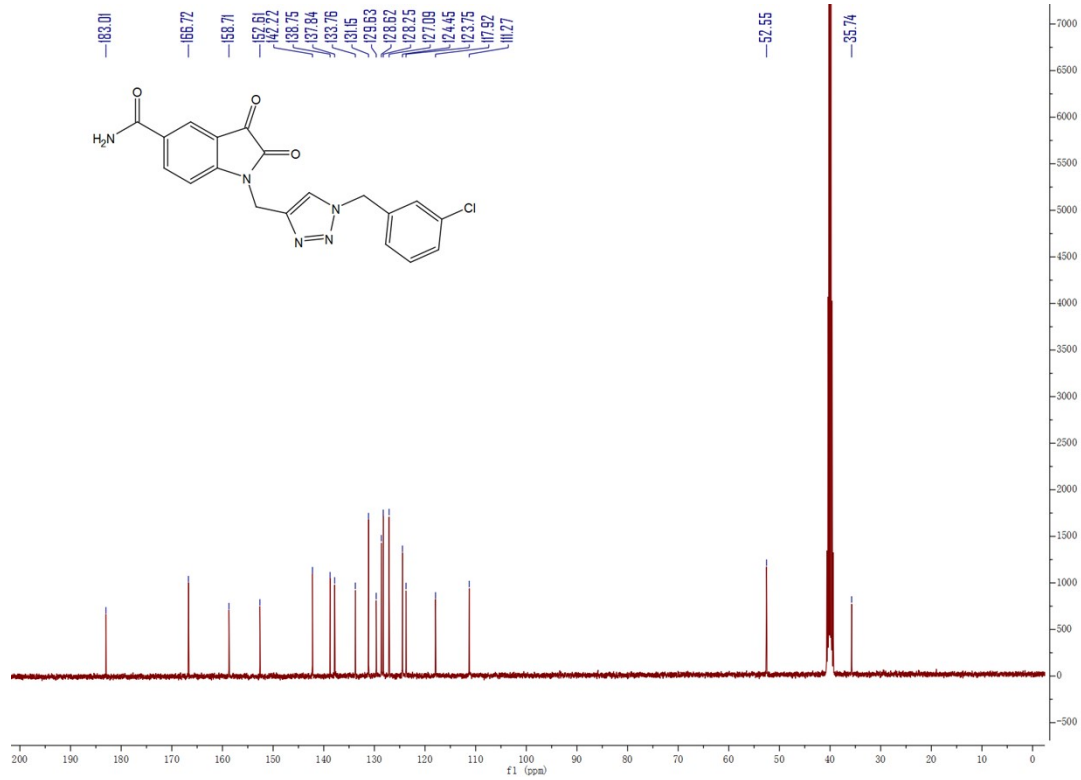

## Compound D1N18

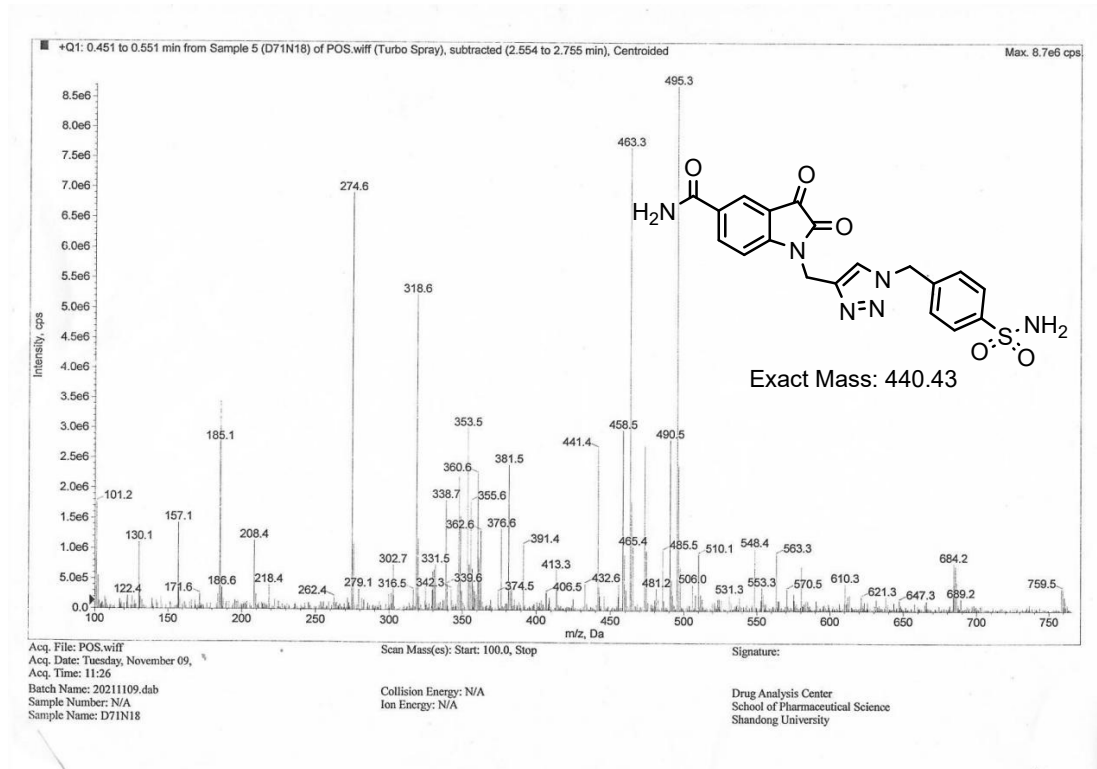

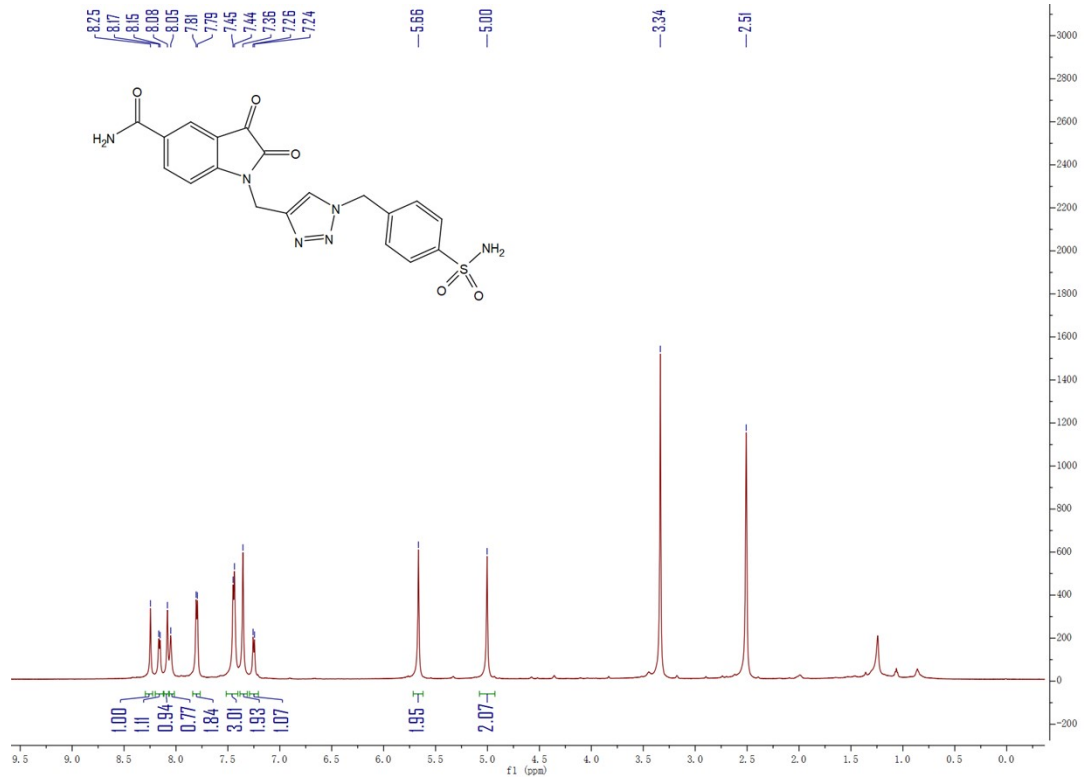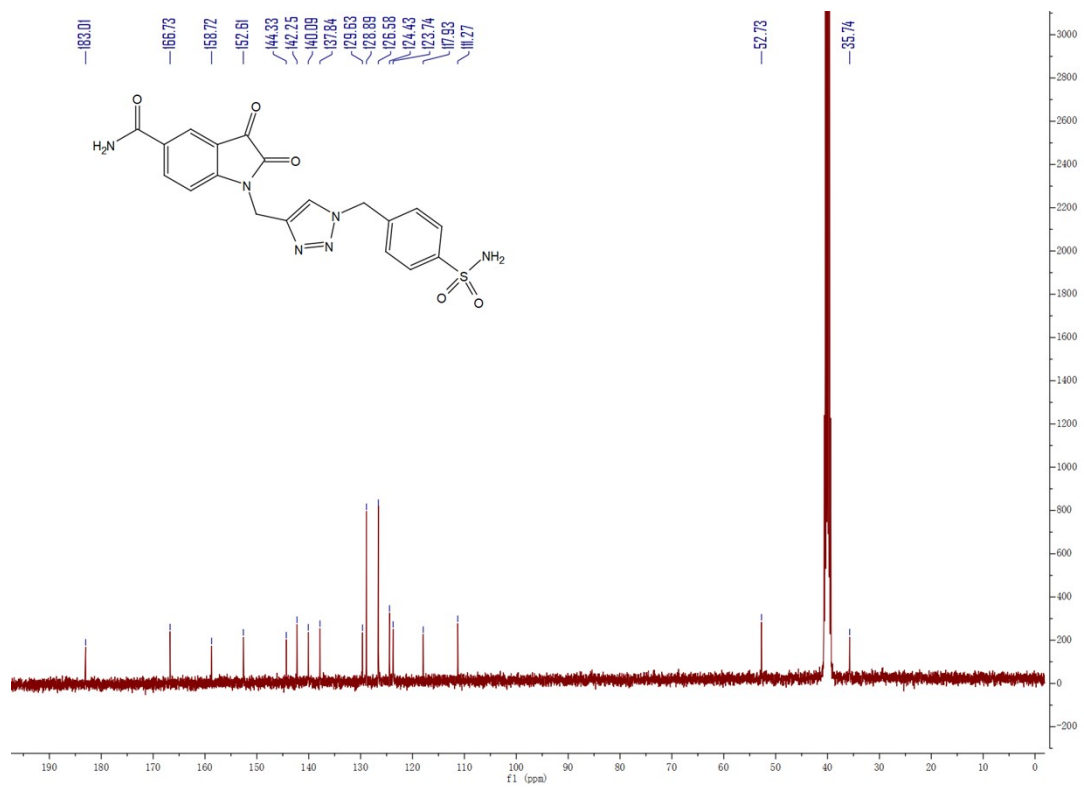

# Compound D1N52

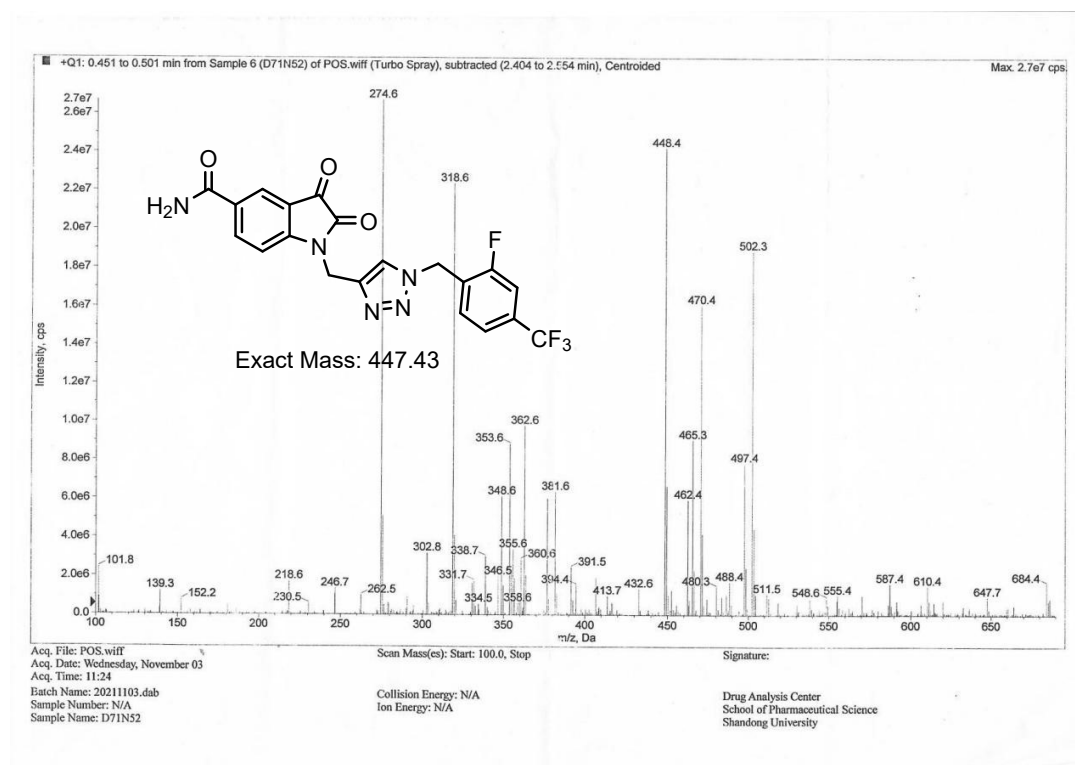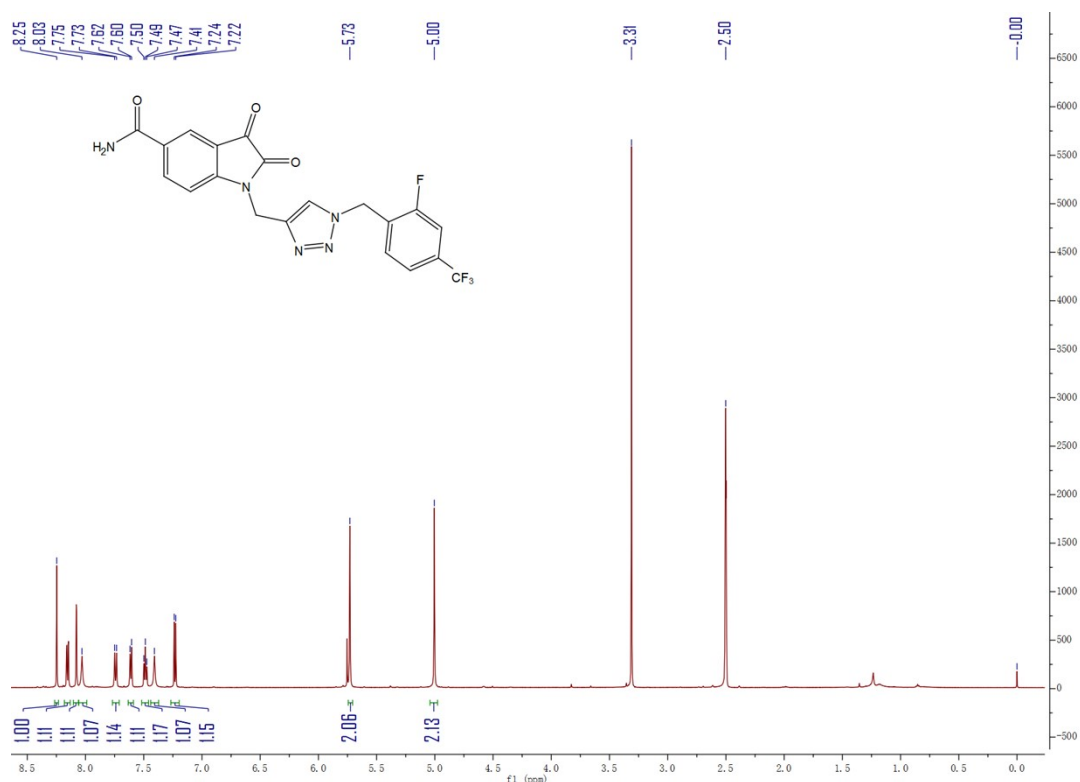

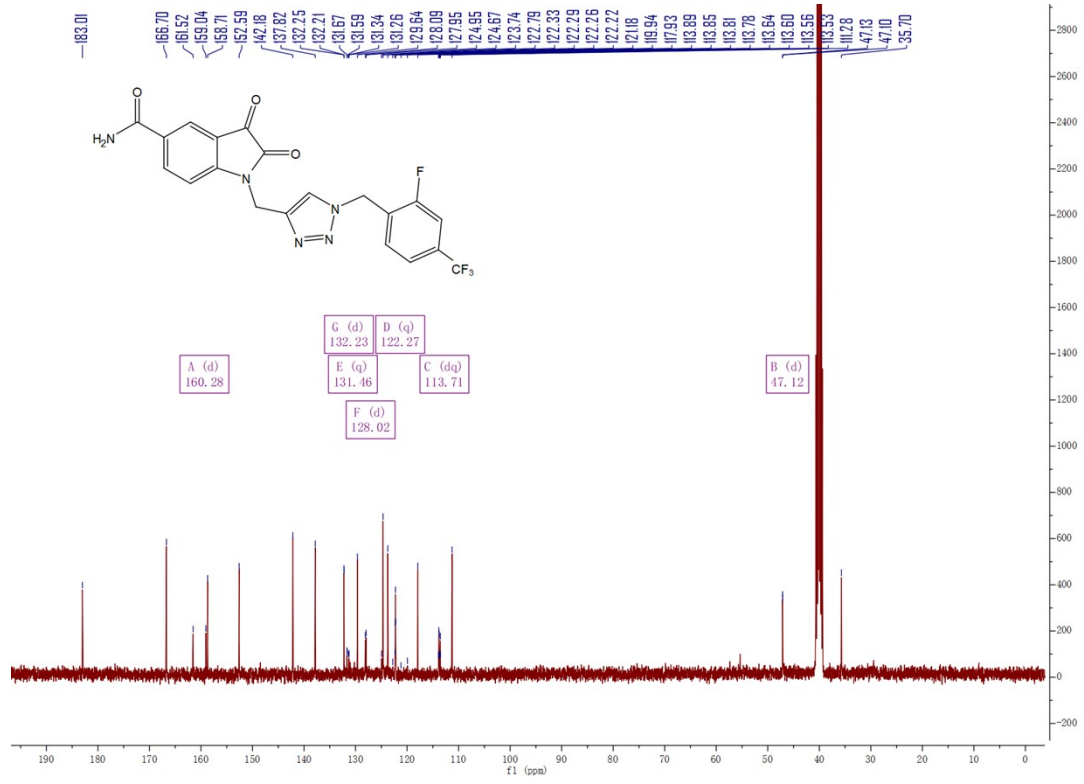

Supplement: d3md00306j1.pdf [file d3md00306j1.pdf]
